# Supplementary material for: Complex subsets but redundant clonality after B cells egress from spontaneous germinal centers
Source: eLife. 2023 Jun 21;12:e81012. doi: 10.7554/eLife.81012 (PMC10351918; doi:10.7554/eLife.81012)
Supplement: Figure 1—source data 1. [file elife-81012-fig1-data1.csv]

	Autoimmune	Autoimmune	Autoimmune	Autoimmune	Autoimmune	Immunized	Immunized	Immunized	Immunized	Immunized
ASC	0.16476190	0.19385343	0.17991170	0.33235981	0.27543424	0.38761468	0.08147714	0.08965517
DZ	0.38444444	0.34920635	0.32671082	0.30373832	0.25930521	0.20718654	0.31008206	0.27241379
LZ	0.27142857	0.23708207	0.27041943	0.16647196	0.28039702	0.16743119	0.35756155	0.32413793
MemB	0.17936508	0.21985816	0.22295806	0.19742991	0.18486352	0.23776758	0.25087925	0.31379310
