# Supplementary material for: Complex subsets but redundant clonality after B cells egress from spontaneous germinal centers
Source: eLife. 2023 Jun 21;12:e81012. doi: 10.7554/eLife.81012 (PMC10351918; doi:10.7554/eLife.81012)
Supplement: Figure 1—source data 2. [file elife-81012-fig1-data2.csv]

ASC_auto	ASC_immu	MemB-auto	MemB-immu	DZ_auto	DZ_immu	LZ_auto	LZ_immu
3	5	1	0	11	8	10	15
2	4	3	3	2	4	4	1
7	5	7	8	5	2	7	8
8	11	2	3	7	5	9	13
7	10	2	1	4	10	5	0
4	6	16	6	5	11	5	19
7	11	2	3	3	10	3	9
5	0	6	2	5	8	8	5
3	2	8	6	8	9	7	10
2	7	2	0	1	11	9	2
7	4	8	11	13	8	3	5
9	7	8	4	5	12	13	23
0	3	5	4	5	2	4	12
7	5	2	2	2	3	6	6
1	4	4	4	11	3	6	8
8	7	2	3	11	7	4	6
9	3	7	0	0	10	9	8
3	4	4	0	9	11	9	5
9	8	5	5	5	8	7	2
4	8	0	2	6	9	7	10
4	4	4	7	7	16	10	11
8	2	4	6	5	10	6	12
5	1	3	3	11	2	8	8
2	4	4	0	10	11	10	5
1	5	2	3	3	13	5	9
1	2	7	0	5	11	6	10
2	1	8	8	3	10	4	10
6	4	6	10	6	6	5	10
3	4	2	0	5	8	1	4
8	7	3	10	11	3	3	17
3	1	2	0	5	4	9	6
8	4	3	2	2	6	8	3
7	4	1	9	0	2	5	9
6	9	6	7	9	11	6	8
0	4	4	3	3	10	4	4
2	10	2	4	2	3	10	12
8	9	5	0	5	8	2	3
2	6	2	3	8	6	4	7
2	7	2	5	9	8	7	4
19	4	6	9	6	7	7	8
6	0	6	13	4	8	2	5
17	4	1	1	5	9	9	3
0	10	5	7	5	8	6	7
3	1	14	5	3	11	8	8
3	0	6	9	6	3	2	3
1	5	8	11	10	10	6	5
4	4	3	7	6	10	10	2
7	9	2	3	4	7	6	10
4	0	2	3	10	3	2	5
8	6	1	1	12	6	6	9
6	10	2	4	7	1	2	2
5	3	9	3	9	3	4	7
0	5	8	3	6	9	2	7
3	4	0	6	6	11	4	4
4	0	12	7	9	1	4	9
4	3	5	2	11	2	3	5
8	6	0	2	5	9	8	6
3	0	3	0	10	11	8	10
4	3	2	7	2	16	2	7
2	2	0	5	1	1	10	8
10	4	6	3	6	0	9	9
3	5	6	2	4	8	8	7
3	10	3	8	3	14	7	7
7	8	13	3	5	8	3	8
4	9	3	11	3	15	5	3
1	7	2	3	3	2	5	3
4	15	7	10	5	6	9	6
2	4	5	3	9	9	0	8
6	19	2	12	6	13	2	2
3	4	0	12	5	6	9	5
8	4	7	4	1	8	4	5
6	1	4	10	8	3	4	3
3	10	2	7	5	8	1	8
4	4	20	3	10	7	3	5
5	2	4	2	4	6	7	8
7	9	3	10	5	6	6	5
4	5	7	7	0	5	6	3
6	1	6	3	3	7	6	7
2	0	6	2	6	7	4	3
4	5	8	7	8	5	6	5
3	4	5	1	6	6	9	2
8	10	4	1	8	8	7	8
5	4	10	10	11	8	3	8
5	8	6	4	9	0	6	3
2	9	4	4	5	10	5	1
3	4	6	10	3	7	3	6
8	5	11	5	9	2	7	3
7	9	4	2	8	10	9	6
3	4	6	10	5	13	4	1
8	4	10	6	4	4	6	1
0	5	3	0	7	7	6	5
2	9	13	6	4	7	12	6
3	6	5	10	2	13	8	4
4	5	2	12	5	2	4	4
9	7	9	3	8	8	5	6
3	7	5	5	4	11	4	8
1	7	9	5	1	12	6	0
8	2	2	3	3	4	2	6
4	7	1	6	4	11	6	3
4	10	5	12	5	9	6	7
7	4	4	5	5	6	5	6
4	11	5	7	1	5	10	5
5	0	3	9	4	5	7	9
5	6	10	2	4	11	5	5
6	5	2	5	2	1	8	9
8	4	0	7	1	2	7	8
5	5	7	5	2	6	10	5
2	11	2	4	18	7	9	6
3	1	2	9	6	6	6	3
5	12	2	2	7	5	6	8
8	0	2	1	2	5	7	6
3	11	6	0	4	5	8	3
7	7	3	4	7	3	6	8
6	5	14	1	5	2	4	5
8	7	3	7	8	1	9	6
1	5	4	8	8	2	6	5
5	10	2	2	5	4	5	5
3	7	8	11	10	2	7	10
7	8	2	0	8	7	9	7
3	10	6	1	3	6	9	5
4	5	7	2	8	2	9	5
5	2	13	4	5	6	2	3
3	5	7	4	7	8	5	4
7	5	5	2	3	5	10	9
2	5	1	6	8	7	5	5
7	5	1	4	5	2	10	5
3	5	14	0	2	7	10	3
3	8	6	3	11	8	4	9
2	9	6	2	2	8	7	4
2	8	7	2	4	6	6	5
8	7	0	1	3	7	8	9
1	7	0	0	5	3	9	7
8	3	0	3	7	2	5	0
7	0	3	1	5	8	3	5
6	3	6	6	5	7	4	2
3	10	2	10	6	4	10	8
4	4	4	4	6	5	13	3
5	7	8	4	2	5	3	7
3	1	8	3	7	7	4	3
3	5	2	1	15	6	10	6
8	4	9	6	6	5	3	3
4	4	3	7	3	5	9	2
1	11	5	5	6	1	7	9
4	0	3	3	9	7	7	10
4	2	1	7	0	7	1	7
8	9	3	4	7	9	7	6
4	10	1	1	4	3	6	4
3	4	8	8	3	6	2	3
2	7	2	1	2	4	14	7
7	1	7	4	4	5	9	7
4	5	6	0	5	3	3	4
3	7	14	0	5	4	8	0
7	7	4	4	4	4	7	6
0	4	10	5	0	5	13	6
0	6	9	0	8	4	6	6
2	8	4	6	4	11	2	4
4	3	5	2	9	1	8	5
2	5	1	3	6	5	6	7
2	6	5	5	6	4	5	5
4	3	5	2	5	5	7	5
1	3	5	6	8	3	1	5
1	10	2	5	4	7	5	10
4	1	2	1	10	5	6	12
5	4	10	5	2	6	13	11
7	3	2	2	0	7	5	6
1	5	2	6	3	11	5	6
2	7	5	0	3	4	3	6
3	8	0	4	0	1	8	6
8	7	3	3	4	7	8	7
7	5	2	0	0	4	9	3
5	8	5	4	11	9	6	4
2	4	4	0	6	7	6	3
6	6	5	0	2	10	8	10
2	4	1	2	5	7	7	9
7	5	9	5	7	6	6	6
2	7	3	8	6	2	13	2
2	4	2	3	15	4	5	2
5	7	6	3	5	2	5	2
6	7	1	4	4	2	4	10
0	10	2	8	8	2	6	6
4	5	3	12	3	6	12	7
6	8	6	4	5	2	10	4
2	4	5	5	3	11	7	7
7	6	0	4	7	2	5	5
2	4	8	4	4	6	5	2
4	3	8	1	9	7	5	7
6	4	13	3	7	6	11	6
5	6	8	15	5	5	9	1
4	10	6	9	6	5	0	3
4	7	4	4	7	5	8	5
9	6	2	1	9	5	5	6
2	12	9	0	11	8	6	9
3	10	4	2	3	7	7	8
4	6	9	0	4	7	10	6
2	7	5	1	7	6	1	7
4	8	6	2	11	6	5	7
1	7	5	6	4	6	2	9
3	9	10	8	4	6	2	7
8	1	4	1	5	4	9	6
6	7	9	5	4	8	8	7
8	2	11	2	5	4	4	7
4	0	12	2	12	5	8	9
1	10	3	15	0	7	5	6
3	6	3	4	5	6	5	1
2	8	0	7	5	4	6	2
2	3	0	8	10	4	10	4
9	0	9	4	9	6	8	5
1	3	1	4	1	1	8	7
3	6	7	5	2	3	4	7
6	7	4	5	2	6	16	6
2	12	2	2	1	6	5	6
4	5	10	9	1	2	5	3
7	12	5	4	12	10	5	4
3	11	7	5	2	3	1	7
2	9	5	6	2	2	9	3
1	2	3	1	3	2	7	5
3	4	11	4	8	7	5	6
3	6	6	7	3	7	3	3
3	1	2	2	12	6	6	6
1	4	2	8	6	3	10	6
1	5	1	4	4	11	2	5
4	0	0	3	8	3	3	7
6	6	5	0	5	4	4	8
7	4	6	6	2	5	3	8
0	9	3	3	6	4	7	5
1	11	6	4	9	7	3	3
3	7	5	7	11	9	10	8
6	6	2	3	6	3	8	5
4	8	6	1	2	5	9	7
2	7	1	0	7	8	9	6
2	4	8	6	5	8	8	5
3	1	1	6	2	3	3	5
2	2	6	4	8	9	11	4
7	6	2	12	14	5	12	1
6	10	6	6	3	3	7	5
6	3	5	0	2	5	9	9
6	3	6	4	2	3	5	4
6	3	3	16	5	2	6	3
3	6	5	0	3	4	3	4
6	4	6	4	12	5	5	4
11	4	0	6	11	7	1	7
8	1	2	5	11	6	9	4
3	2	4	4	5	7	4	8
3	7	9	5	11	9	5	11
3	9	8	2	7	4	9	8
4	1	6	3	7	6	8	5
2	9	9	5	5	12	8	5
10	10	0	0	12	2	10	5
0	5	2	1	6	2	4	7
5	5	2	3	5	5	4	4
4	11	1	3	4	0	12	5
7	2	4	7	8	7	4	9
1	9	10	15	9	7	13	4
3	0	10	2	5	9	3	4
5	2	1	5	5	5	2	8
5	8	1	2	8	4	6	10
7	5	2	4	14	7	7	7
4	6	6	5	7	6	6	2
6	4	6	3	4	3	3	5
2	7	5	1	3	5	5	5
1	0	5	4	2	7	5	6
3	5	6	9	7	3	11	6
5	4	6	7	4	8	8	6
4	10	8	4	4	6	8	5
7	4	8	0	6	6	7	1
2	0	2	3	11	7	7	3
4	12	0	9	11	4	11	4
6	4	12	10	4	7	2	6
10	4	2	4	4	5	5	6
12	10	7	3	11	8	9	6
4	3	5	4	5	7	0	4
6	6	10	4	7	7	6	5
7	4	10	9	5	3	5	6
8	5	0	4	6	3	10	11
7	9	0	3	6	8	3	5
5	11	4	5	6	2	5	4
9	5	7	5	10	5	14	7
1	6	10	5	6	11	4	4
4	2	1	0	1	4	4	3
5	2	1	3	3	4	10	7
6	8	6	2	3	6	6	5
2	8	9	4	3	6	6	7
7	5	3	8	2	2	3	2
1	4	2	1	4	3	3	6
10	2	8	9	4	5	8	11
1	6	9	1	8	8	3	6
1	0	5	5	6	5	8	4
8	8	12	8	2	10	11	7
9	7	11	4	5	5	10	8
5	10	2	7	13	2	15	6
1	10	9	3	7	6	8	1
2	4	5	6	9	3	2	7
6	4	3	0	4	2	7	6
2	9	1	4	9	8	4	6
3	9	3	1	7	5	3	4
2	7	8	2	2	8	5	4
2	9	7	5	11	4	7	2
4	11	0	4	3	13	4	5
4	9	2	3	3	7	2	7
1	5	4	4	13	5	10	8
9	9	4	5	5	8	2	6
3	6	7	4	6	5	9	11
2	7	6	1	7	7	9	8
3	7	4	8	7	5	4	8
7	2	1	8	7	7	5	4
4	7	6	0	10	10	6	5
1	2	2	8	11	8	7	7
4	4	1	5	6	2	4	7
6	1	11	1	8	6	5	2
0	3	9	6	7	3	2	3
4	4	4	0	5	9	3	7
6	7	13	4	8	2	9	3
6	9	4	7	12	10	6	7
7	5	10	5	6	4	9	6
6	12	0	1	9	4	11	9
3	4	1	6	10	2	1	5
2	10	6	6	5	6	4	14
8	0	3	5	2	1	6	6
0	7	0	6	6	7	6	8
5	4	2	5	4	7	3	6
2	5	7	5	8	3	8	6
3	5	6	1	4	6	4	5
3	6	5	2	9	4	13	3
4	6	4	1	12	3	5	6
1	3	4	1	4	3	4	3
0	0	0	8	7	4	12	8
8	4	2	7	10	12	6	7
2	0	0	5	3	5	15	7
4	0	7	4	6	8	10	8
5	0	6	2	8	6	3	5
4	5	8	0	5	7	5	4
4	18	0	2	4	5	5	8
5	9	6	3	6	6	5	9
9	7	1	8	8	9	3	5
2	5	5	3	14	3	9	7
1	7	4	5	5	5	8	6
8	10	2	5	5	4	6	8
10	14	4	5	5	7	2	7
3	5	3	6	13	7	10	1
6	8	6	5	12	2	8	4
3	4	9	7	14	3	4	6
3	1	8	10	7	3	9	5
8	11	0	2	8	3	7	8
3	5	0	5	4	8	15	6
8	13	7	7	10	5	10	4
4	8	3	6	1	4	9	3
5	3	1	5	4	5	10	2
4	5	2	6	10	7	9	4
4	7	9	0	2	8	4	5
3	8	5	4	7	8	6	5
5	7	0	7	7	7	12	11
4	9	6	1	4	3	7	5
2	6	4	11	3	6	7	7
8	8	17	4	8	5	6	6
3	10	3	3	4	3	7	8
1	0	12	4	4	1	10	5
7	4	8	6	7	7	1	3
4	6	0	9	8	7	9	4
1	4	11	1	6	6	8	7
8	0	3	4	7	4	6	7
5	0	3	15	8	6	11	6
9	8	12	5	6	6	1	6
6	9	2	4	5	8	7	4
9	9	11	6	11	8	8	8
3	10	0	3	4	4	6	6
0	6	3	2	4	5	8	1
5	10	6	2	6	9	7	8
7	1	10	10	6	5	7	4
8	12	5	11	6	5	7	6
3	9	12	4	4	10	9	8
4	5	4	4	5	4	11	9
4	7	7	4	12	6	11	6
3	3	10	2	3	1	8	5
4	1	8	5	3	6	8	7
3	6	9	10	7	6	6	3
8	7	5	6	8	8	5	7
2	4	7	5	4	7	9	10
2	7	1	2	2	4	10	6
2	10	6	2	16	3	6	4
2	8	2	0	9	5	8	5
7	7	10	9	4	2	7	4
3	2	14	1	7	7	8	4
8	8	0	3	8	5	7	7
5	10	0	3	5	2	3	7
6	7	1	8	5	9	8	4
1	6	5	6	6	8	3	8
2	9	3	7	8	6	10	6
10	5	8	5	5	6	10	5
6	1	2	7	9	6	8	4
7	2	1	8	2	9	7	8
13	3	8	1	3	6	11	7
6	12	10	2	7	5	7	9
7	8	8	4	5	5	10	5
4	3	13	3	6	8	5	2
5	5	3	5	9	10	7	3
8	12	4	2	2	6	9	11
9	10	6	6	7	5	10	9
2	4	3	7	12	2	13	7
1	11	1	6	4	1	9	7
0	4	1	5	5	6	6	6
2	10	4	6	3	4	5	7
6	8	3	6	6	7	12	6
20	5	2	6	1	4	10	7
9	7	7	0	4	11	7	2
3	2	5	4	3	8	10	6
7	4	1	10	4	5	2	6
7	2	2	0	5	5	6	8
1	3	6		7	5	10	2
4	4	5		5	4	8	2
1	4	15		6	6	5	8
6	4	0		11	8	13	8
2	10	9		9	6	12	4
1	6	14		6	6	6	8
6	4	1		4	5	11	4
8	8	1		3	6	5	5
4	0	2		12	1	5	2
5	1	8		4	6	9	3
7	8	1		8	4	13	6
2	6	1		3	4	6	5
4	13	3		7	8	1	4
6	4	2		4	5	8	4
1	4	16		12	6	9	1
6	4	5		7	7	11	6
2	1	4		5	6	7	5
2	7	9		5	6	7	13
3	4	3		5	4	10	3
1	4	2		4	7	7	2
8	7	2		3	10	7	9
4	10	7		6	8	9	7
0	4	2		0	3	9	5
3	6	8		5	6	7	9
7	11	0		6	7	10	10
7	4	0		5	5	8	9
9	3	0		8	10	8	12
9	0	0		11	1	6	8
8	6	0		2	7	6	12
3	2	3		1	1	11	1
2	4	6		7	5	9	9
2	4	0		12	2	8	8
4	6	0		10	7	9	3
1	2	9		7	4	2	4
3	2	0		8	5	6	12
6	6	0		5	5	9	7
5	0	9		6	10	5	3
3	4	1		3	1	11	12
4	5	5		4	8	3	13
8	6	5		4	8	4	3
8	8	0		7	4	10	16
2	5	4		15	8	4	9
7	2	1		11	5	9	4
9	14	6		7	5	3	11
7	6	5		6	7	0	8
7	6	0		7	6	7	7
2	3	2		5	6	1	10
5	7	9		11	5	4	12
2	10	1		5	4	6	4
2	6	1		4	5	5	11
1	1	5		9	0	4	7
2	6	5		11	4	6	5
2	1	4		9	4	6	13
5	5	4		5	4	7	3
4	2	6		3	7	3	9
4	9	7		5	6	5	5
8	0	8		4	6		14
3	1	2		14	7		4
5	2	10		7	4		5
5	0	5		10	5		4
3	5	0		8	7		9
4	0	7		4	4		7
10	8	2		1	7		5
2	2	0		3	8		7
7	1	0		4	14		4
4	4	3		8	8		10
2	4	6		2	8		7
4	2	9		1	10		1
7	3	9		9	4		6
3	3	0		4	4		12
1	2	6		6	3		6
5	2	4		4	8		4
1	5	8		10	4		6
5	2	1		3	7		8
5	4	2		4	5		2
0	2	1		10	8		8
3	0	4		7	8		7
3	0	0		3	5		12
3	1	6		7	2		11
3	2	3		8	5		4
2	8	4		2	4		4
4	8	5		4	11		4
0	7	12		4	4		7
1	5	3		11	4		9
3	7	4		6	7		4
4	2	5		3	3		4
5	0	0		8	9		13
0	5	12		5	9		7
3	1	5		7	7		5
3	0	1		9	5		5
4	4	8		4	8		3
7	2	0		6	6		10
7	0	8		3	3		4
1	4	17		12	7		6
6	6	7		12	3		10
3	0	4		8	7		14
4	7	13		18	9
7	2	5		4	11
7	5	10		16	1
3	0	10		6	10
4	3	0		5	4
4	0	3		2	2
6	0	2		6	3
9	5	3		6	7
5	1	7		5	5
12	3	12		3	12
8	0	3		11	5
17	11	3		8	6
6	7	3		6	5
6	0	8		4	7
2	0	10		11	3
3	0	2		6	8
1	0	8		5	2
4	7	2		6	7
4	0	0		7	1
6	5	11		9	5
2	4	2		8	8
8	2	7		10	6
2	2	6		10	8
8	3	0		3	5
0	2	3		9	7
10	7	0		4	6
3	2	2		6	5
2	3	0		11	4
12	0	0		4	3
3	6	4		10	2
5	6	13		7	9
3	2	6		6	8
6	3	3		8	14
5	3	10		6	3
2	4	0		8	12
10	6	0		5	11
9	3	5		3	8
2	4	6		5	2
2	8	3		3	6
6	1	4		4	7
2	0	3		2	6
6	2	1		7
5	3	6		3
2	4	10		0
3	5	10		9
3	5	4		10
3	4	1		8
3	2	0		15
6	4	8		8
3	4	1		5
5	5	7		5
6	4	3		6
0	2	0		3
3	4	6		4
3	5	8		1
2	0	4		5
3	0	4		9
3	6	2		1
4	2	1		6
7	5	3		0
3	3	1		6
3	0	0		7
5	0	1		8
5	3	9		19
0	3	7		6
3	0	0		6
4	9	2		5
1	6	6		5
3	3	1		5
6	0	8		11
5	9	2		4
2	8	0		6
9	7			8
2	7			11
2	3			1
6	4			5
5	8			9
3	2			7
3	3			4
7	11			7
6	12			12
3	1			3
2	4			8
3	2			5
1	11			11
9	3			12
6	4			13
2	6			8
4	5			6
5	6			5
8	12			4
1	2			6
7				5
7				5
3				2
6				7
9				5
5				9
7				3
6				9
3				5
1				6
3				7
4				10
4				6
7				2
3				5
7				5
4				3
1				8
3				3
3				3
0				6
2				0
9				16
7				10
3				7
10				5
2				3
3				19
3				7
3				1
3				9
8				1
4				9
2				3
10				5
4				8
7				11
4				3
8				6
1				4
2				6
7				14
3				8
0				6
3				10
2				6
5				8
2				5
3				9
3				10
4				6
2				8
4				7
2				6
2				10
6				3
7				8
3				8
1				11
4				6
3				11
7				8
2				8
4				9
0				12
2				9
2				10
3				9
3				5
1				8
0				11
3				1
7				4
2				11
1				10
9				7
2				8
3				4
7				6
7				8
4				5
9				9
1				5
3				4
3				6
4				2
3				8
6				11
4				4
2				5
6				10
7				5
5				9
8				8
9				4
6				1
3				6
1				3
7				9
3				9
3				6
5				5
4				8
3				19
2				5
4				4
2				5
2				4
3				12
5				4
12				10
6				13
6				9
2				7
0				7
2				7
10				5
7				5
4				6
4				2
2				7
7				7
4				9
7				12
0				1
1				7
2				5
3				7
3				10
7				4
4				20
1				5
3				9
3				5
4				6
2				5
6				1
3				8
3				7
0				3
4				11
2				4
3				5
6				6
2				7
9				5
3				9
1				9
5				11
12				5
3				4
1				6
6				12
2				8
3				4
5				9
2				4
5				9
3				10
5				2
1				5
6				5
5				10
3				1
10				2
3				6
3				1
0				7
5				6
1				9
8				5
4				3
2				4
11				5
3				9
3				8
3				5
8				3
2				7
3				8
5				6
2				10
1				9
3				8
3				9
8				5
3				7
8				13
4				13
3				6
3				7
2				4
3				9
7				15
8				4
5				6
4				6
2				6
3				2
3				7
3				18
3				11
6				4
7				6
2				5
6				15
6				7
7				2
3				4
3				10
0				0
4				9
8				13
3				8
6				4
10				8
3				8
5				8
2				13
3				5
2				7
6				10
6				3
2				2
2				6
6				8
9				5
3				7
2				5
8				7
2				6
5				5
3				9
1				6
7				11
5				6
2				5
4				9
4				11
3				5
3				4
5				8
2				11
3				8
0				9
4				4
3				6
5				3
7				12
1				6
3				10
10				12
3				9
7				4
5				10
3				9
2				10
4				5
7				9
5				10
4				10
3				14
2				7
6				8
2				10
7				6
2				9
4				9
4				8
5				4
3				11
9				6
1				10
5				8
2				5
5				10
4				7
6				17
7				9
6				9
2				11
6				6
3				7
1				8
3				6
6				3
4				8
7				4
4				3
4				9
5				12
6				4
3				12
7				6
2				10
2				8
6				8
4				8
4				9
2				7
9				4
5				3
2				9
3				8
3				7
6				11
4				9
5				4
3				4
2				5
7				9
5				2
5				4
7				6
12				6
5				10
4				7
3				10
6				17
6				6
2				9
4				8
3				7
3				9
5				7
5				2
2				8
6				7
3				2
8				10
1				9
4				7
3				9
6				7
8				5
4				6
10				9
3				13
5				6
4				6
3				5
3				6
5				9
7				9
2				6
3				4
6				5
3				5
2				10
2				6
2				3
13				8
2				9
10				6
3				9
5				9
3				0
6				7
4				7
1				9
4				6
0				7
3				4
9				5
6				6
7				5
10				4
3				9
3				4
3				2
5				3
1				9
3				7
5				3
3				6
2				7
4				1
0				8
5				4
4				8
6				8
9				6
7				8
1
9
7
4
1
3
3
2
1
5
6
11
5
3
8
4
3
3
2
4
13
2
2
6
5
3
1
6
8
2
6
6
5
0
7
2
8
5
5
2
6
3
3
8
3
3
2
4
3
3
4
7
1
2
5
2
3
2
2
5
2
2
5
3
3
6
1
2
2
4
6
9
5
4
5
11
4
5
3
9
4
7
2
1
3
3
6
9
7
6
4
1
2
3
3
2
2
9
6
3
6
1
5
3
6
4
5
11
2
5
13
7
5
1
9
2
5
3
6
0
5
0
6
8
15
0
5
12
6
3
7
2
3
8
10
2
8
12
4
9
5
3
3
3
9
2
2
4
2
1
3
6
2
6
5
7
2
2
7
6
8
5
9
4
7
9
8
3
4
3
5
10
3
4
5
2
7
2
19
6
5
11
4
19
2
2
2
9
3
9
5
0
17
4
3
5
6
3
4
1
9
8
6
2
14
5
5
3
9
4
3
5
7
4
6
4
2
5
1
4
7
8
4
2
14
4
1
3
6
2
5
6
5
7
3
8
0
1
5
9
6
3
9
0
3
0
2
3
6
5
7
6
5
10
6
9
5
10
2
2
7
4
6
3
8
0
6
3
0
8
2
8
7
5
1
1
2
6
5
2
6
7
6
10
0
6
7
7
0
1
4
2
8
0
7
2
5
3
4
1
3
0
5
5
2
5
1
9
6
5
4
4
14
2
6
9
12
7
4
5
5
6
2
5
2
3
8
9
4
3
1
6
3
8
8
4
5
5
7
4
2
10
9
5
5
7
4
10
9
2
8
7
0
2
3
5
4
6
5
3
4
5
6
3
7
1
11
9
4
8
1
9
4
4
7
4
4
5
5
3
9
7
6
7
8
2
6
6
3
2
2
7
0
4
4
10
6
9
5
1
2
3
5
3
5
4
8
3
6
2
11
8
5
5
3
6
5
1
2
3
12
1
6
6
4
5
3
7
1
7
2
6
10
5
11
5
13
7
3
1
5
3
8
5
4
5
4
0
9
4
5
5
6
2
0
4
1
2
3
6
12
3
4
0
9
5
3
4
9
8
5
9
4
2
8
2
9
10
2
10
7
6
11
3
6
6
3
3
9
9
11
2
1
12
6
4
11
3
1
5
6
8
6
8
5
10
6
4
1
9
4
2
6
0
3
8
2
0
7
1
3
3
5
4
6
2
10
6
7
2
6
4
5
4
1
5
9
6
12
0
6
5
6
8
10
5
8
5
4
2
12
2
7
6
4
2
9
4
10
2
4
4
9
4
5
1
3
9
7
1
8
8
1
6
11
6
6
5
1
7
10
0
8
6
4
3
9
8
6
6
6
3
6
0
1
9
1
1
4
6
10
9
3
5
9
6
8
7
5
5
10
0
10
9
6
1
6
5
6
7
0
4
8
5
3
10
0
5
2
8
9
8
6
8
2
9
6
6
2
4
2
4
1
9
1
0
7
5
7
6
1
9
0
4
2
8
5
6
1
4
6
3
0
3
3
1
6
4
6
6
1
3
3
1
3
8
11
0
10
2
6
5
5
0
3
7
2
7
3
5
8
0
6
5
13
6
12
8
1
2
2
10
1
7
0
8
8
10
6
6
1
4
4
6
4
3
1
4
2
10
3
1
1
14
0
2
8
5
4
6
4
5
6
2
0
4
3
0
1
4
6
5
2
12
10
6
0
3
8
9
1
0
4
3
3
4
1
5
6
6
5
4
1
2
7
0
4
2
4
7
1
3
1
1
3
7
14
6
4
3
7
6
3
7
3
5
4
8
1
7
0
4
13
2
6
7
3
2
1
3
1
1
3
5
1
3
1
1
9
1
0
4
5
4
3
0
1
4
4
2
1
6
1
8
6
4
0
8
1
1
4
7
0
1
3
3
0
1
12
2
4
8
11
3
9
6
4
2
4
4
1
3
1
0
0
4
4
4
6
0
1
1
6
3
2
4
1
5
3
