# Supplementary material for: Complex subsets but redundant clonality after B cells egress from spontaneous germinal centers
Source: eLife. 2023 Jun 21;12:e81012. doi: 10.7554/eLife.81012 (PMC10351918; doi:10.7554/eLife.81012)
Supplement: Figure 1—source data 3. [file elife-81012-fig1-data3.csv]

	Autoimmune	Autoimmune	Autoimmune	Autoimmune	Autoimmune	Immunized	Immunized	Immunized
IGHV1-72	2.8436019	2.44648318	2.45231608	2.20440882	2.90909091	5.05050505	4.52674897	4.81927711
IGHV6-3	3.31753555	2.44648318	2.17983651	3.63636364	5.41082164	8.08080808	6.99588477	6.5060241
IGHV1-53	3.31753555	2.20440882	3.36391437	4.18181818	6.53950954	4.04040404	4.9382716	11.0843373
IGHV1-64	2.36966825	2.17983651	2.90909091	5.81039755	5.41082164	2.05761317	3.03030303	2.89156627
IGHV1-50	0.47393365	1.83486239	2.45231608	3.20641283	3.45454545	1.01010101	1.64609053	0.96385542
IGHV1-75	1.8957346	1.63487738	2.44648318	1.80360721	3.81818182	0.72289157	2.05761317
IGHV8-8	1.22324159	2.8436019	2.17983651	2	2.20440882	1.2345679	1.51515152	1.92771084
