# Supplementary material for: Complex subsets but redundant clonality after B cells egress from spontaneous germinal centers
Source: eLife. 2023 Jun 21;12:e81012. doi: 10.7554/eLife.81012 (PMC10351918; doi:10.7554/eLife.81012)
Supplement: Figure 2—source data 1. [file elife-81012-fig2-data1.csv]

ASC_Early_1	ASC_Early_1	ASC_Mid_1	ASC_Mid_2	ASC_Mid_3	ASC_Late_1	ASC_Late_2
0.10829637	0.16631928	0.17180625	0.12347460	0.11959097	0.01991698	0.08590312
0.12669909	0.17169936	0.17105802	0.14116473	0.13667540	0.02932321	0.10826074
0.16523257	0.18899756	0.17852244	0.14611726	0.10924055	0.03956674	0.10897333
0.09122976	0.14704363	0.15997720	0.11193059	0.07599808	0.06194217	0.11262537
0.10541036	0.10783318	0.14896763	0.12441879	0.15456149	0.05609891	0.09860510
0.15921116	0.15509593	0.15272656	0.12408031	0.06830207	0.03917482	0.13868847
0.09395543	0.12269075	0.16302353	0.15930023	0.10063599	0.05747065	0.11820141
0.10881300	0.19900950	0.17707944	0.13977518	0.16548198	0.09158605	0.09420483
0.11098641	0.17153902	0.18726952	0.11235815	0.08675823	0.06071295	0.08554683
0.11930593	0.19124223	0.17137869	0.11617052	0.07222133	0.06197780	0.08729268
0.11991164	0.20513780	0.19361160	0.17396184	0.09317157	0.05816543	0.14738211
0.13006609	0.19621257	0.18245952	0.12192471	0.09128320	0.12087364	0.08937702
0.14479896	0.16220405	0.20185987	0.13357562	0.09085565	0.02757736	0.09486398
0.16177650	0.19608786	0.15970997	0.17282169	0.11344485	0.01419842	0.11362300
0.11691875	0.20406891	0.16760195	0.14374788	0.14647355	0.03007144	0.10416333
0.15017904	0.14529777	0.22603460	0.12181783	0.05342668	0.05371172	0.14481677
0.09472147	0.19687172	0.14759589	0.14210892	0.13984644	0.07546363	0.10523222
0.11139615	0.13309461	0.14604600	0.14650918	0.08415727	0.08506583	0.09534498
0.12669909	0.18685978	0.18807119	0.12755420	0.09142572	0.11371208	0.09639606
0.13425258	0.11437123	0.18147970	0.10806477	0.05823669	0.08798746	0.16386083
0.09896140	0.18648567	0.16288101	0.17007821	0.12089145	0.06331392	0.09513121
0.14112910	0.13001265	0.14123599	0.16339764	0.13806495	0.07810023	0.09190672
0.13411006	0.16875991	0.16724565	0.17389058	0.12253042	0.05739939	0.11775604
0.12016105	0.17061265	0.17975166	0.11905653	0.11766697	0.10565977	0.15513156
0.16708532	0.13998895	0.18212103	0.12839150	0.13526802	0.10298755	0.08812998
0.15548786	0.21009032	0.21971033	0.13172287	0.10004810	0.06340299	0.14148540
0.15837386	0.18204977	0.18650348	0.13754832	0.12744731	0.06805266	0.09853384
0.09137228	0.15584416	0.18149751	0.12878343	0.09119413	0.05894928	0.13884881
0.07850997	0.15828479	0.17307110	0.14219799	0.09053498	0.01161527	0.14837974
0.14239396	0.18133718	0.18805337	0.13341528	0.15840949	0.03794559	0.11335578
0.07599808	0.18769708	0.18678852	0.11547575	0.12739387	0.07102774	0.11271445
0.18520300	0.15924679	0.18915789	0.10788663	0.08492331	0.08592094	0.11383678
0.14406855	0.18500704	0.15114104	0.12892594	0.07649689	0.07826056	0.11561826
0.12935350	0.19045838	0.18281581	0.12908628	0.13630128	0.07590900	0.11096859
0.10890207	0.19232893	0.16916965	0.12167531	0.09365258	0.05645520	0.13811840
0.09625354	0.20287531	0.13519676	0.15263749	0.05882458	0.04792190	0.16277413
0.12787487	0.19432419	0.13343310	0.11584986	0.13190102	0.01163309	0.12367057
0.09377728	0.17871840	0.17036324	0.14130725	0.10906241	0.07888408	0.11565389
0.10583792	0.14226925	0.13076087	0.12506013	0.14194859	0.07938289	0.10254218
0.15575508	0.18910445	0.17173499	0.08784494	0.10633674	0.10948996	0.15422301
0.15276219	0.19598097	0.13943669	0.14592129	0.11754227	0.08761335	0.12144371
0.16273850	0.16582046	0.11283915	0.11827267	0.11809453	0.01571268	0.12739387
0.17332051	0.18117685	0.13608751	0.13241765	0.07972138	0.02782677	0.11764915
0.14818378	0.19453797	0.20430050	0.14376570	0.07384248	0.03468548	0.09482835
0.20927084	0.18801774	0.21032191	0.16745943	0.10774411	0.03060588	0.11399711
0.11731067	0.16370050	0.14798781	0.15586197	0.10400299	0.03030303	0.07694226
0.13451980	0.16419931	0.16959721	0.09475709	0.11927030	0.02545740	0.10393173
0.12245916	0.19674701	0.16346890	0.12810646	0.14169918	0.03774963	0.12032138
0.12089145	0.17690129	0.15930023	0.14312437	0.14891419	0.03848004	0.09436517
0.17683003	0.14658044	0.12678816	0.16382520	0.11239378	0.03122940	0.08825468
0.12163968	0.16728128	0.15878360	0.12365275	0.11070137	0.03370566	0.08454920
0.15030374	0.17992981	0.15983468	0.12641405	0.05216183	0.05176990	0.14166355
0.16355798	0.16199027	0.14511963	0.14276807	0.18399159	0.02941229	0.11144959
0.15530971	0.20805943	0.13184758	0.12798176	0.07316552	0.03733989	0.10760159
0.12229883	0.17716851	0.16795824	0.12887250	0.09953147	0.06302888	0.13722766
0.10389610	0.17248321	0.16598080	0.11228689	0.11267882	0.03190637	0.12085582
0.11064793	0.15700212	0.13503643	0.12457912	0.15919334	0.07637219	0.11971568
0.08597438	0.18550585	0.20093350	0.12700194	0.12055297	0.02604529	0.10161581
0.12865872	0.16464468	0.13154472	0.11171682	0.08303493	0.03286837	0.12545205
0.17071954	0.21352858	0.16394990	0.11501256	0.12637842	0.00602141	0.10763722
0.07993515	0.17175280	0.14442485	0.16058290	0.09297561	0.06174621	0.07040422
0.11109330	0.15666364	0.17084424	0.13396754	0.09593287	0.04254182	0.14606381
0.09881888	0.20567224	0.12354586	0.17683003	0.11950190	0.04092067	0.10124169
0.10517877	0.20303565	0.16211498	0.14275025	0.13517895	0.02239324	0.07257763
0.13200791	0.18498922	0.14989400	0.13077869	0.12260168	0.03479237	0.10639018
0.11447811	0.20185987	0.17727540	0.10847452	0.08804090	0.04747653	0.16466250
0.13854595	0.14870041	0.15922897	0.14214455	0.11716815	0.07409189	0.12470383
0.11798764	0.18245952	0.14257211	0.13794025	0.11362300	0.02121747	0.15386671
0.10810040	0.18960326	0.13968610	0.12999483	0.09739369	0.01147275	0.12848057
0.13573121	0.15520282	0.19263179	0.14025618	0.11415745	0.06128302	0.10751251
0.17463880	0.18634315	0.22003100	0.15564819	0.03618193	0.02814744	0.07854560
0.11756008	0.18329681	0.15379545	0.12990576	0.07466196	0.05608109	0.14198422
0.14087970	0.16177650	0.15947838	0.13407443	0.12965635	0.02641940	0.10614077
0.08727487	0.15016122	0.15652112	0.12441879	0.13117061	0.04615823	0.14232270
0.15669927	0.19174104	0.13327276	0.12424064	0.17305328	0.03707267	0.10207899
0.13161598	0.18110559	0.21719844	0.19475175	0.12037482	0.03737552	0.11374771
0.12742950	0.20943117	0.22697878	0.16478720	0.09171076	0.05864643	0.12901502
0.10377140	0.14111129	0.15516719	0.10446618	0.16582046	0.03171040	0.08552901
0.14209111	0.15130137	0.19243582	0.12249479	0.08688294	0.01793954	0.12010760
0.14682985	0.17887873	0.23039923	0.11406837	0.07220352	0.04286249	0.14829067
0.12363494	0.19774464	0.18327900	0.17848681	0.09668110	0.03081966	0.11034507
0.15906864	0.15775034	0.18306522	0.11055885	0.08878913	0.03085529	0.16131331
0.16699624	0.17063047	0.18587996	0.14882511	0.07924038	0.03662730	0.14349848
0.11378334	0.11462063	0.18468637	0.13414569	0.08381879	0.04688864	0.13795806
0.15352823	0.12919317	0.19405697	0.11340922	0.08538649	0.03992304	0.12621809
0.11544012	0.19124223	0.17096895	0.12815991	0.09131883	0.03363440	0.12367057
0.07900878	0.18258422	0.19888479	0.14647355	0.12954946	0.04462616	0.12994139
0.07377122	0.17009602	0.14786311	0.12092708	0.15664582	0.06928188	0.13681791
0.15336789	0.16986443	0.19375412	0.14625978	0.10678211	0.02973296	0.16464468
0.09767873	0.20045250	0.13229295	0.11087952	0.12518483	0.01881246	0.17859370
0.12951383	0.21025065	0.21796448	0.10248873	0.07403844	0.02962607	0.12750076
0.15112323	0.16651524	0.22081485	0.15908646	0.12199597	0.02367591	0.14324907
0.14121818	0.13211480	0.12892594	0.14479896	0.08075464	0.09418702	0.08383660
0.11586767	0.13710295	0.14257211	0.09541624	0.06965600	0.04077815	0.07982827
0.12554113	0.14930611	0.15593323	0.13911603	0.07690663	0.04941835	0.14456737
0.09190672	0.21067821	0.15459712	0.14073718	0.11460282	0.04902642	0.13434165
0.08617035	0.18010796	0.18712700	0.09962054	0.08992928	0.07849215	0.14027399
0.11251848	0.21203214	0.13320150	0.10615859	0.07170470	0.09509558	0.15336789
0.09356350	0.15212086	0.17109365	0.14052340	0.05360483	0.02807618	0.12411594
0.14200203	0.16386083	0.11903871	0.15375982	0.08622379	0.04867012	0.16959721
0.18021485	0.14775622	0.20991217	0.17177062	0.10268470	0.08584968	0.15242371
0.11487004	0.13982862	0.19102845	0.15832042	0.16900932	0.03179948	0.14720396
0.08948390	0.19015552	0.12999483	0.13133095	0.08506583	0.04760123	0.13646162
0.11627741	0.10475122	0.18481107	0.12890813	0.11946627	0.02125310	0.13719203
0.11194841	0.14216236	0.21978159	0.14271462	0.09208487	0.02020202	0.17631340
0.12530953	0.20275061	0.21238843	0.14121818	0.13022643	0.05718561	0.13542836
0.17137869	0.19391445	0.12637842	0.09370602	0.10802915	0.06593270	0.14969804
0.14588566	0.15796412	0.16991787	0.14536903	0.04614042	0.05476280	0.13537491
0.14266118	0.19624820	0.19266741	0.14251866	0.14422888	0.03407977	0.18066022
0.09283309	0.18215666	0.15196052	0.16503661	0.10735218	0.07793989	0.14061247
0.11700782	0.19113534	0.18865908	0.13724547	0.10190084	0.03338500	0.12292235
0.10136640	0.14579659	0.21762600	0.12659220	0.07598026	0.08976894	0.11640212
0.14127162	0.17114710	0.17431814	0.13981081	0.14244740	0.03937078	0.14576096
0.11027381	0.15420519	0.19325530	0.11693656	0.10672866	0.07469759	0.11761353
0.19332656	0.17927066	0.22357615	0.16145583	0.08324871	0.10622985	0.16241783
0.12377746	0.19988242	0.19769120	0.14410418	0.15099852	0.01460816	0.15167549
0.10455525	0.13533928	0.14982274	0.13619440	0.14727522	0.06065951	0.12634279
0.15595104	0.20586821	0.14797000	0.12408031	0.07736982	0.04366415	0.13765521
0.15995938	0.19273867	0.16040475	0.16476939	0.06946003	0.05062975	0.13419913
0.10535692	0.11098641	0.13482265	0.13223950	0.13036895	0.01485757	0.10293410
0.15397360	0.16225750	0.18381344	0.14487022	0.09101598	0.05880676	0.16446653
0.11540449	0.11431778	0.16968628	0.13521458	0.07298737	0.09545187	0.10165143
0.11127144	0.08038052	0.14896763	0.11451374	0.12343898	0.07549926	0.09931769
0.05866424	0.09947803	0.14367663	0.12780361	0.16359361	0.01337894	0.09577254
0.12374183	0.17613525	0.15374201	0.14011366	0.08739957	0.08606346	0.08643757
0.11150304	0.15571945	0.20057720	0.15073130	0.11440686	0.04368197	0.13712077
0.04626512	0.20107602	0.16676465	0.15169330	0.07190066	0.13309461	0.11150304
0.13614095	0.14064810	0.12365275	0.14633104	0.11722160	0.07487574	0.13991770
0.17620651	0.08451357	0.18475763	0.13758395	0.08975113	0.09662765	0.11928812
0.15935368	0.18294052	0.14572533	0.14308874	0.09758965	0.08030927	0.13161598
0.05846828	0.16658650	0.14358755	0.18188944	0.10729874	0.07077833	0.09356350
0.08310619	0.17627777	0.16918747	0.09587943	0.08870005	0.07416315	0.11955534
0.07843871	0.19405697	0.17310673	0.14597474	0.11476315	0.02581369	0.11886056
0.15917553	0.13936544	0.12019668	0.13113498	0.08581405	0.05967969	0.12160405
0.13663977	0.12078457	0.19074341	0.12810646	0.11715034	0.04834946	0.11187715
0.10785100	0.13232858	0.20148576	0.13026206	0.11275008	0.08185916	0.11063011
0.10722748	0.23118308	0.16943687	0.16329076	0.12228101	0.02429943	0.13038676
0.11326671	0.11829049	0.13977518	0.15691305	0.12174657	0.05565354	0.06924625
0.10931181	0.13754832	0.16925872	0.12616464	0.05372954	0.02095024	0.11779167
0.14905670	0.20889673	0.16339764	0.14886074	0.07745889	0.06267258	0.07564178
0.09924643	0.17837992	0.16409242	0.10359325	0.08939483	0.05296350	0.14355192
0.08788057	0.18329681	0.15894394	0.13738799	0.14146759	0.04886609	0.12673472
0.11957316	0.12089145	0.21709155	0.10088540	0.09774999	0.05305257	0.13348654
0.14624196	0.17852244	0.16842143	0.15016122	0.12390216	0.02798710	0.11210874
0.06869399	0.17349865	0.12131901	0.12678816	0.09566565	0.04271997	0.17055921
0.11148522	0.11134270	0.16361142	0.16254253	0.11458500	0.08725705	0.14187733
0.13867066	0.12965635	0.14513744	0.19150945	0.06368803	0.03958456	0.13129532
0.10720966	0.15139045	0.14519089	0.12555894	0.09201361	0.02529706	0.12979887
0.18930041	0.16544635	0.12121212	0.14134288	0.09217394	0.06774981	0.12327864
0.11563608	0.15219212	0.22824364	0.14314218	0.09479272	0.03579000	0.08435323
0.15757219	0.17326706	0.21912244	0.15089163	0.08251830	0.03413322	0.17928848
0.16859958	0.17528014	0.18871252	0.10418114	0.04519623	0.02707855	0.13913384
0.13113498	0.16072542	0.15315412	0.16505442	0.15561256	0.01428750	0.11317763
0.14668733	0.18456167	0.20690147	0.14260774	0.06201343	0.05736376	0.11937719
0.16867084	0.13808277	0.12872998	0.17230506	0.13386065	0.06901466	0.14613507
0.08111093	0.20854043	0.18237044	0.12821335	0.12277983	0.07507170	0.12470383
0.13988207	0.18657474	0.16309479	0.11896745	0.05153831	0.02971514	0.14797000
0.14666952	0.12226320	0.15662801	0.13300554	0.10484029	0.08029145	0.12285109
0.16633709	0.08497675	0.13909821	0.12627153	0.08079027	0.07122370	0.16733472
0.13393191	0.13508988	0.21732314	0.09867636	0.07496482	0.02319491	0.09090909
0.11225126	0.07093866	0.17255447	0.11335578	0.06753603	0.03614630	0.14451392
0.10751251	0.15946057	0.18944293	0.14766715	0.07489356	0.02750610	0.13022643
0.17877185	0.13076087	0.14752463	0.13049365	0.14982274	0.05266065	0.09737588
0.12334990	0.16892024	0.18336807	0.13257798	0.15019685	0.00203089	0.11462063
0.13815403	0.10794007	0.20695491	0.09374165	0.13804714	0.05818324	0.10099229
0.13505425	0.20045250	0.18680633	0.13884881	0.12817772	0.06343862	0.11998290
0.12388435	0.14428233	0.18370655	0.13327276	0.10973937	0.07941852	0.12703757
0.15896175	0.16054727	0.19724583	0.14396166	0.09465021	0.11508382	0.12005416
0.14960896	0.21700248	0.22254289	0.15673490	0.07781519	0.02590277	0.11362300
0.15947838	0.16542854	0.18197852	0.16020879	0.11166337	0.04198956	0.12039264
0.10621203	0.20487058	0.18204977	0.14697237	0.08560027	0.03242300	0.12062423
0.18456167	0.17919940	0.14399729	0.11599238	0.07058237	0.03678763	0.09682362
0.12669909	0.21637896	0.18857000	0.17102239	0.08323090	0.03283274	0.14446048
0.12053516	0.17014947	0.15060660	0.11237596	0.11511945	0.02253576	0.13745925
0.06586144	0.19637290	0.10416333	0.14846882	0.12354586	0.04811786	0.13353999
0.11633086	0.17770296	0.15263749	0.14747118	0.15078474	0.08652664	0.07266670
0.06021413	0.10843889	0.15493560	0.14463863	0.09299343	0.05374735	0.09912173
0.12153279	0.11902090	0.15659238	0.12789268	0.07503608	0.01247038	0.12525609
0.15604012	0.14693674	0.20399765	0.10633674	0.13380721	0.06178184	0.14508400
0.13737017	0.19457360	0.13608751	0.15352823	0.11048759	0.07464415	0.05251813
0.08989365	0.13624784	0.17893218	0.11479878	0.05873550	0.03215577	0.11729286
0.10500062	0.17535140	0.20447865	0.10054692	0.09564784	0.01011882	0.13270269
0.11804108	0.18374218	0.16817202	0.14761370	0.11766697	0.01535639	0.08258956
0.16357579	0.17262573	0.16697843	0.17697255	0.09468584	0.06646714	0.15782160
0.14873604	0.17116491	0.14150322	0.13008391	0.09981651	0.05677587	0.10920492
0.18418755	0.14878948	0.13501862	0.12326083	0.11527978	0.05201931	0.09862291
0.15274437	0.18509611	0.16272068	0.15928242	0.14050558	0.03447170	0.10044003
0.14478114	0.13744143	0.18824934	0.19254271	0.10790444	0.05716780	0.16150927
0.20497746	0.16571357	0.17360554	0.14027399	0.03726863	0.02504765	0.12620027
0.11348048	0.19300590	0.16726346	0.14784530	0.08622379	0.05829013	0.08793401
0.13008391	0.18552367	0.18547022	0.13503643	0.15083819	0.02305239	0.10393173
0.11944845	0.11023818	0.15921116	0.19172323	0.06726881	0.11923467	0.08437105
0.16154490	0.10031532	0.19692516	0.13973955	0.08682949	0.07781519	0.11659808
0.11413963	0.15880142	0.18261985	0.14323125	0.05998254	0.05271409	0.07548145
0.15691305	0.17499510	0.17843336	0.18507830	0.08182353	0.05253594	0.12655657
0.11305293	0.14950208	0.15459712	0.13318369	0.09121194	0.02983984	0.13418132
0.11921686	0.15668145	0.16411024	0.08905635	0.12897939	0.02903818	0.12766109
0.11004222	0.17285732	0.16778009	0.14754244	0.13179413	0.01001194	0.11153867
0.15270875	0.18892630	0.12361712	0.14679422	0.09381291	0.05022001	0.13858158
0.12942476	0.18819589	0.18523863	0.08022019	0.11091515	0.03685889	0.10646144
0.12675253	0.16118861	0.18785741	0.12399124	0.07906223	0.02672225	0.11629523
0.13229295	0.16662213	0.16576702	0.13065398	0.09602195	0.03860474	0.11016692
0.10688900	0.14560063	0.16578483	0.10567759	0.10929400	0.07088522	0.07489356
0.14421107	0.17185969	0.16564231	0.14465644	0.07065363	0.02207258	0.10330821
0.09324283	0.18901537	0.15698431	0.12026794	0.13544617	0.04198956	0.13083213
0.09908610	0.17469225	0.12844494	0.16307698	0.10255999	0.02754173	0.10966811
0.13311243	0.13195447	0.15049971	0.14298185	0.17150339	0.00888960	0.11303511
0.16997132	0.18678852	0.13430602	0.13849251	0.10667522	0.08736394	0.08064775
0.12760765	0.15311849	0.13740580	0.13913384	0.14862915	0.03252988	0.12605776
0.11413963	0.13088558	0.12842713	0.16159835	0.09518465	0.10972155	0.14257211
0.15568382	0.16282757	0.16539291	0.10893770	0.11599238	0.07681756	0.11731067
0.15069567	0.20052376	0.16938343	0.12479290	0.12938913	0.02727451	0.08820124
0.17030980	0.19165197	0.15101634	0.15187145	0.09286872	0.00632427	0.13321932
0.11935938	0.17413999	0.17216254	0.14367663	0.09969180	0.01460816	0.07797552
0.11371208	0.14948426	0.12762546	0.13909821	0.05066538	0.04690645	0.12757202
0.12516701	0.20887891	0.21001906	0.14900326	0.16875991	0.09112287	0.11132489
0.15547004	0.17029199	0.16056509	0.17221599	0.09065968	0.04444801	0.11394367
0.11814797	0.14287496	0.12976324	0.15098071	0.07421659	0.02645503	0.15429427
0.09258369		0.11317763	0.12595087	0.08449575		0.10307662
0.07881282		0.19008426	0.13909821	0.09762528		0.14503055
0.12340335		0.15187145	0.12057079	0.10512533		0.12286890
0.06899685		0.19469831	0.12229883			0.11257193
0.09746495		0.14269681	0.15650330			0.09880106
0.14925267		0.13296991	0.15766127			0.10311225
0.07459070		0.17210910	0.15570164			0.13790462
0.12402686		0.12889031	0.14558281			0.11802327
0.14221581		0.18675289	0.09611102			0.10211462
0.15165767		0.21048225	0.12732261			0.12135464
0.12937131		0.13266706	0.15033937			0.12889031
0.15103415		0.13138439	0.10020843			0.10362888
0.10081414		0.15007215	0.12967417			0.12620027
0.10535692		0.14310655	0.15434771			0.12286890
0.16049383		0.14150322	0.13184758			0.14444266
0.11975130		0.18422318	0.14761370			0.10895552
0.13282739		0.20873639	0.13320150			0.12260168
0.20469243		0.20440739	0.15748312			0.08843283
0.14527996		0.15571945	0.15149734			0.09614665
0.16038694		0.15358167	0.10530348			0.14310655
0.09796376		0.15746531	0.14907452			0.10159799
0.14684767		0.17232288	0.16532165			0.13158035
0.13318369		0.16991787	0.12919317			0.06263695
0.09381291		0.19786935	0.13061835			0.12445442
0.12055297		0.15856983	0.17795236			0.09814191
0.10683555		0.15456149	0.08453138			0.14144977
0.11041633		0.16963284	0.10806477			0.09815973
0.09564784		0.15245934	0.18000107			0.10872392
0.13758395		0.10519659	0.12212068			0.12449005
0.12363494		0.13348654	0.14383696			0.12600431
0.11638430		0.18604030	0.12404468			0.12901502
0.11139615		0.10852796	0.09946021			0.11271445
0.11435341		0.10749470	0.14836193			0.13818966
0.11654464		0.15810664	0.14478114			0.13409225
0.13044020		0.16033349	0.15281563			0.12612902
0.13806495		0.21652148	0.17013165			0.20376606
0.10460870		0.15689523	0.14816596			0.10296973
0.15311849		0.21119484	0.10530348			0.12937131
0.12680598		0.05816543	0.18718045			0.14526215
0.11829049		0.15596886	0.16159835			0.13624784
0.12869435		0.16200809	0.09684143			0.16647961
0.14469207		0.17506636	0.16240001			0.11310637
0.18433007		0.17244758	0.14006021			0.13883099
0.16915184		0.16389646	0.11282134			0.10952559
0.14677641		0.13642599	0.11401493			0.12390216
0.14861133		0.15386671	0.14107566			0.12958509
0.10640800		0.21016158	0.11499474			0.09929988
0.14617070		0.13890225	0.16754850			0.20296439
0.08994709		0.14422888	0.10136640			0.10824292
0.16125986		0.13847469	0.11873586			0.12156842
0.16138457		0.16211498	0.15374201			0.09331409
0.09482835		0.16655087	0.09976306			0.16264942
0.14593911		0.16892024	0.15734060			0.09297561
0.09427609		0.15785723	0.13594499			0.12994139
0.08075464		0.13892006	0.10316570			0.12739387
0.10603388		0.19656886	0.11127144			0.11048759
0.11396148		0.11118237	0.14723959
0.07491137		0.14864696	0.15124793
0.12570146		0.16054727	0.13797588
0.10451962		0.15598667	0.11371208
0.07510733		0.19979335	0.13749488
0.11469189		0.13302336	0.13434165
0.12618246		0.12981669	0.16065416
0.14592129		0.13175850	0.11527978
0.11984038		0.19911638	0.13956140
0.15561256		0.10295192	0.11403274
0.10801133		0.15728716	0.13022643
0.14900326		0.13615877	0.13295210
0.12028575		0.16767320	0.14638448
0.13093902		0.17773859	0.16569576
0.12071331		0.17536921	0.08966205
0.10346855		0.09431172	0.15253060
0.13740580		0.17752481	0.10063599
0.13965047		0.14779185	0.14111129
0.07496482		0.17330269	0.11928812
0.08966205		0.16051164	0.14091533
0.15076693		0.17463880	0.12869435
0.16729909		0.15607575	0.11902090
0.16227531		0.19760212	0.11160993
0.13109935		0.09099817	0.14586785
0.11558263		0.11527978	0.14668733
0.09448987		0.15513156	0.12101616
0.06897903		0.13833218	0.13614095
0.12368838		0.17927066	0.12486416
0.12187127		0.12901502	0.12028575
0.13508988		0.15124793	0.16480502
0.09293998		0.17022073	0.12128338
0.10234621		0.08292805	0.14255429
0.10313007		0.17221599	0.11679404
0.18954982		0.15356386	0.10865266
0.07544582		0.11779167	0.14394385
0.12523827		0.08738175	0.13777992
0.12791050		0.16699624	0.14959115
0.11984038		0.11038070	0.12878343
0.16827891		0.17456754	0.15689523
0.08470953		0.19607005	0.12673472
0.09228083		0.17189532	0.12591524
0.12812428		0.17807707	0.09215613
		0.17750699	0.10343292
		0.15288689	0.14039870
		0.12946039	0.14709707
		0.17859370	0.16101046
		0.19054745	0.12844494
		0.16918747	0.12244134
		0.10902678	0.08380097
		0.17948444	0.10528566
		0.17474569	0.13788680
		0.19687172	0.18404504
		0.15308286	0.11884275
		0.10742344	0.13402099
		0.16277413	0.15759001
		0.18219229	0.14775622
		0.20075535	0.10548162
		0.17403310	0.14756026
		0.16273850	0.08087934
		0.16248909	0.11394367
		0.17809488	0.12507794
		0.15703775	0.12860528
		0.16656869	0.13435947
		0.11511945	0.14337377
		0.17829084	0.14845100
		0.17900344	0.13646162
		0.16036912	0.11743538
		0.18728734	0.11513726
		0.18914008	0.16874209
		0.13158035	0.10852796
		0.20624232	0.13852814
		0.16282757	0.13411006
		0.17754262	0.17043450
		0.17118273	0.18073148
		0.15220993	0.09938895
		0.18087400	0.14091533
		0.15424082	0.17406873
		0.14976930	0.14091533
		0.20415798	0.10845670
		0.16514350	0.08567153
		0.18144407	0.07052892
		0.10152673	0.11943064
		0.13838562	0.09155042
		0.16680028	0.12135464
		0.16079668	0.14552937
		0.13256017	0.14283933
		0.13599843	0.11796982
		0.16391428	0.12983450
		0.18620063	0.14317781
		0.13651506	0.11381897
		0.13042239	0.14184170
		0.16649743	0.15349260
		0.15151515	0.12274420
		0.13874192	0.12333209
		0.19940142	0.12930006
		0.13402099	0.11121800
		0.17618869	0.12807083
		0.16190120	0.12899720
		0.20800599	0.14264336
		0.15032156	0.16605205
		0.17225162	0.14130725
		0.14517307	0.12083801
		0.15149734	0.14401511
		0.14633104	0.16535728
		0.18392033	0.12479290
		0.15278000	0.12463257
		0.20308909	0.12454349
		0.18197852	0.12420501
		0.14134288	0.15131919
		0.15477527	0.13017298
		0.15424082	0.13988207
		0.17378369	0.10337947
		0.15447241	0.15347478
			0.14900326
			0.17818396
			0.10628329
			0.13120624
			0.14250085
			0.15522064
			0.13989988
			0.14332033
			0.14845100
			0.12753639
			0.14722178
			0.11832612
			0.14893200
			0.15611138
			0.12274420
			0.15817790
			0.15429427
			0.10013717
			0.11499474
			0.14987619
			0.16726346
			0.11886056
			0.15881923
			0.15274437
			0.12564801
			0.13717421
