# Supplementary material for: Complex subsets but redundant clonality after B cells egress from spontaneous germinal centers
Source: eLife. 2023 Jun 21;12:e81012. doi: 10.7554/eLife.81012 (PMC10351918; doi:10.7554/eLife.81012)
Supplement: Figure 2—source data 2. [file elife-81012-fig2-data2.csv]

ASC_Early_1	ASC_Early_2	ASC_Mid_1	ASC_Mid_2	ASC_Mid_3	ASC_Late_1	ASC_Late_2
0.07777956	0.15057097	0.15003652	0.08812998	0.10311225	0.04263089	0.12142590
0.10975718	0.14385477	0.13341528	0.08950172	0.08429979	0.01314735	0.07712041
0.08811216	0.15878360	0.17474569	0.12256605	0.07198974	0.06174621	0.10154455
0.18087400	0.12523827	0.12449005	0.12737605	0.07147311	0.03212014	0.05335542
0.10084977	0.17777421	0.13227513	0.10868829	0.11495911	0.03764274	0.09598632
0.09794595	0.16389646	0.09329628	0.12541642	0.07067144	0.01209627	0.12242353
0.11638430	0.07704915	0.16845706	0.10715622	0.09546969	0.05656209	0.11766697
0.07409189	0.19482301	0.12076675	0.13161598	0.12315394	0.00327793	0.12566583
0.10811822	0.17975166	0.09807065	0.13553525	0.10573103	0.02187661	0.09851602
0.13496517	0.17310673	0.12910409	0.12114086	0.10195429	0.02928758	0.08408601
0.10738781	0.10826074	0.10220369	0.12942476	0.07567741	0.10551725	0.15245934
0.12265512	0.14458518	0.14214455	0.12780361	0.12229883	0.10516096	0.08759553
0.10637237	0.16286320	0.15789286	0.08458483	0.10343292	0.03475674	0.09222739
0.06653840	0.14661607	0.19662231	0.10564196	0.06491725	0.06919281	0.08476297
0.08168101	0.17105802	0.14903889	0.08538649	0.09946021	0.06270821	0.11136052
0.09302906	0.17422906	0.11194841	0.10838544	0.08351594	0.03003581	0.10512533
0.13530365	0.16936561	0.09265494	0.11554700	0.06049917	0.06760729	0.10133077
0.11677623	0.15803538	0.19537527	0.10519659	0.10414551	0.03024959	0.12956728
0.14310655	0.12185346	0.10678211	0.11770260	0.10263125	0.01280886	0.14396166
0.14291059	0.10533911	0.14520870	0.11590330	0.11551137	0.04728057	0.10728092
0.12589742	0.13512551	0.15970997	0.13851032	0.08164538	0.01993480	0.10649707
0.12117649	0.17419343	0.16549980	0.10738781	0.07008355	0.04001211	0.11772041
0.14134288	0.15162204	0.16403898	0.11526197	0.08666916	0.03440044	0.08759553
0.06830207	0.19387882	0.17415780	0.11665152	0.11374771	0.01963195	0.09644950
0.05511909	0.09855165	0.16065416	0.08230453	0.10377140	0.05114638	0.13834999
0.09044591	0.18320774	0.10410988	0.13644380	0.13899132	0.00871145	0.09723336
0.09301124	0.14064810	0.12276201	0.13236421	0.12042827	0.04756560	0.12921098
0.08624160	0.17636684	0.13729892	0.08700764	0.07193629	0.02828995	0.14811252
0.14258992	0.14654481	0.12867654	0.09424046	0.11584986	0.04777938	0.06327829
0.08796964	0.16726346	0.16813639	0.10954341	0.09114068	0.07067144	0.11636649
0.10551725	0.18830278	0.17415780	0.12657439	0.06213814	0.05189461	0.06422247
0.10416333	0.17223380	0.12375964	0.10134858	0.11187715	0.01116990	0.10496499
0.14875385	0.16256035	0.14617070	0.09643169	0.08415727	0.04430549	0.08301712
0.11752445	0.16847487	0.17225162	0.10986407	0.09286872	0.01353927	0.11239378
0.12067768	0.18147970	0.14577878	0.13603406	0.09554095	0.03005362	0.11225126
0.12279764	0.17797018	0.13986425	0.09342098	0.11182370	0.10131295	0.09874762
0.09235209	0.09331409	0.17878966	0.11380115	0.08932357	0.03365222	0.09742932
0.16320168	0.15767908	0.13108154	0.10824292	0.10435929	0.02367591	0.10512533
0.10656833	0.18294052	0.12582616	0.13541054	0.12427627	0.03812374	0.10811822
0.12180001	0.16854613	0.15180019	0.10922274	0.06441843	0.01779702	0.11328452
0.11511945	0.12124775	0.14483459	0.06163932	0.05319509	0.02144906	0.07957886
0.12169312	0.18730515	0.12696631	0.12666346	0.07829619	0.00847986	0.12299360
0.12785705	0.19585627	0.18691322	0.13181195	0.13916947	0.04127697	0.08666916
0.10508970	0.17953788	0.12737605	0.12105179	0.13182976	0.04211426	0.12705539
0.13785117	0.19492990	0.15431208	0.10918711	0.16909839		0.12254823
0.10763722	0.18016140	0.16646180	0.14004240	0.04551690		0.08235797
0.14533340	0.19913420	0.18805337	0.08711453	0.08412164		0.11590330
0.11982256	0.18406285	0.18416974	0.13156254			0.09750058
0.10842107	0.19893824	0.12775016	0.13015517			0.14068373
0.09543406	0.17226943	0.14467426	0.15190708			0.12025012
0.18782178	0.16350453	0.15406267	0.08408601			0.10957904
0.13327276	0.18172911	0.11194841	0.16754850			0.12049953
0.14084407	0.19829690	0.12409812	0.09251243			0.14096877
0.12534516	0.16899150	0.14251866	0.11939501			0.08698983
0.09452550	0.17980511	0.15333226	0.10879518			0.07706697
0.10330821	0.17658062	0.13225732	0.10982844			0.10997096
0.15071348	0.20180642	0.13261361	0.14084407			0.14793437
0.12954946	0.20634921	0.08109312	0.08982239			0.11928812
	0.18865908	0.15199615	0.10321914			0.13544617
	0.08285679	0.16357579	0.11173463			0.10337947
	0.19651542	0.14870041	0.08576060			0.10530348
	0.17702599	0.19836816	0.13266706			0.09085565
	0.21258440	0.13063617	0.10763722			0.09922862
	0.18315429	0.16125986	0.10656833			0.07220352
	0.18655693	0.08435323	0.10113480			0.09511339
	0.19446671	0.11975130	0.11080826			0.12012542
	0.15634297	0.16138457	0.13259580			0.11328452
	0.16630146	0.14510181	0.09858728			0.11323108
	0.22466285	0.19316623	0.12092708			0.09096254
	0.18358185	0.17832647	0.12962072			0.10932963
	0.16166961	0.15481090	0.13804714			0.09126539
	0.17226943	0.08588531	0.10158018			0.12883687
	0.17330269	0.16851050	0.11540449			0.12260168
	0.17495947	0.18632533	0.19824346			0.09276183
	0.22243600	0.16133112	0.15650330			0.08930576
		0.22186593	0.10720966			0.10899115
		0.12171094	0.08668698			0.11184152
		0.08223327	0.10239966			0.16403898
		0.10118825	0.12158623			0.08934139
		0.14410418	0.09938895			0.12395561
		0.15016122	0.12288672			0.11260756
		0.12721572	0.10336166			0.10818948
		0.16006627	0.11344485			0.14344503
		0.13106372	0.07186503			0.09229865
		0.12883687	0.11267882			0.10795789
		0.16184775	0.10583792			0.10011936
		0.16468031	0.11601019			0.09440080
		0.12848057	0.10459088			0.13027987
		0.10560633	0.10831418			0.12290453
		0.12618246	0.11118237			0.11162774
		0.11561826	0.11410400			0.11996508
		0.17291077	0.11561826			0.10168706
		0.14000677	0.09096254			0.14522652
		0.12276201	0.09326065			0.11324889
		0.13247110	0.15185363			0.09536280
		0.17018510	0.12183564			0.09734025
		0.14902107	0.09885451			0.10229277
		0.14866478	0.13341528			0.06267258
		0.15653893	0.11937719			0.13095683
		0.17332051	0.14558281			0.09616447
		0.17022073	0.13758395			0.07760141
		0.19485864	0.11511945			0.11417526
		0.19795842	0.15598667			0.10503625
		0.11438904	0.10963248			0.09381291
		0.12285109	0.10430585			0.13038676
		0.17789892	0.13549962			0.11531541
		0.12573709	0.13779773			0.09206706
		0.15830260	0.14930611			0.12283327
		0.17804144	0.10382484			0.15479308
		0.14230488	0.10480466			0.08923450
		0.12826679	0.07710260			0.11845082
		0.15791068	0.14519089			0.05219746
		0.19432419	0.10348636			0.10991752
		0.15744749	0.13927636			0.08627723
		0.13902695	0.12668127			0.16266724
		0.13133095	0.09637824			0.10562414
		0.15685960	0.13019080			0.10865266
		0.15764345	0.09354569			0.08663353
		0.15318975	0.13003046			0.13733454
		0.15970997	0.12053516			0.10763722
		0.15400923	0.10899115			0.11143178
		0.15399141	0.13496517			0.09678799
		0.20693710	0.12933568			0.10678211
		0.13728110	0.14187733			0.08260738
		0.14369444	0.15564819			0.14091533
		0.17084424	0.13476921			0.10619422
		0.16061853				0.12817772
		0.09099817				0.11289259
						0.09244117
						0.14139633
						0.10560633
						0.07806460
						0.09008961
						0.11091515
						0.10086758
						0.11032726
						0.08843283
						0.07150874
						0.10941870
						0.10019062
						0.05743502
						0.12612902
						0.11116456
						0.11046978
						0.07459070
						0.15069567
						0.08772024
						0.09397324
						0.09552313
						0.08989365
						0.11266100
						0.12315394
						0.11481660
						0.11011348
						0.10774411
						0.16451998
						0.09035683
						0.11791638
						0.11200185
						0.13003046
						0.11631304
						0.10808259
						0.10181177
						0.10377140
						0.15313630
						0.13437728
						0.10450181
						0.11772041
						0.12504231
						0.09719773
						0.09962054
						0.11618834
						0.09356350
						0.11953753
						0.12012542
						0.10407425
						0.12953165
						0.09778562
						0.13382502
						0.14672296
						0.13539273
						0.10831418
						0.10956122
						0.15669927
						0.11467408
						0.11253630
						0.17025636
						0.14690111
						0.13731673
						0.09819536
						0.14011366
						0.11511945
						0.07622967
						0.09110505
