# Supplementary material for: Complex subsets but redundant clonality after B cells egress from spontaneous germinal centers
Source: eLife. 2023 Jun 21;12:e81012. doi: 10.7554/eLife.81012 (PMC10351918; doi:10.7554/eLife.81012)
Supplement: Figure 3—source data 1. [file elife-81012-fig3-data1.csv]

ASC_Late_1_auto	ASC_Late_1_immu	ASC_Late_2_auto	ASC_Late_2_immu
6	10	4	5
1	6	3	4
7	5	0	0
6	5	2	7
3	5	19	4
7	5	3	3
3	8	4	4
8	7	2	7
7	7	3	3
6	6	4	8
5	5	5	4
4	2	3	2
4	4	5	1
1	4	7	4
3	7	1	4
6	4	7	7
1	13	0	4
8	3	1	4
3	9	2	7
3	6	2	4
4	10	4	4
7	8	1	5
5	7	3	0
5	4	1	0
4	6	0	6
2	7	3	2
7	3	6	4
8	4	4	10
9	4	2	8
7	6	3	9
2	6	6	4
3	12	6	4
4		5	4
8		6	4
3		6	10
12		2	4
6		6	9
5		6	4
3		6	5
5		5	9
6		2	4
2		3	6
8		8	7
4		1	7
7		3	7
3		1	10
3		6	4
2		4	1
2		2	5
4		1	7
3		3	10
4		7	10
7		2	5
9		2	5
4		3	3
7		3	4
5		10	7
3		4	5
3		5	4
5		0	0
0		3	7
2		1	7
3		7	3
10		6	6
3		4	3
1		2	1
3		0	4
3		2	5
3		6	4
0		2	7
8		5	8
3		1	4
3		3	4
3		2	4
4		5	6
2		7	6
5		3	10
7		2	7
6		3	8
7		1	0
3		7	6
3		6	4
4		1	6
5		4	8
2		3	7
3		8	6
2		3	3
2		2	3
5		6	3
1		0	6
3		3	1
3		6	7
4		2	1
9		1	10
11		2	5
6		3	8
6		3	0
5		6	5
9		3	4
10		3	3
2		1	2
7		3	8
2		2	2
6		3	6
4		1	8
6		8	9
4		2	9
4		3	7
4		6	7
11		6	4
13		3	4
0		5	7
4		6	9
11		2	4
2		8	0
4		3	5
2		0	6
9		4	3
0		5	0
3		2	0
1		1	5
7		5	8
6		2	4
1		4	8
2		2	5
3		3	7
3		2	8
5		7	7
5		5	6
6		2	8
6		3	10
4		3	0
4		3	4
6		3	4
4		0	8
10		6	10
0		1	6
2		3	12
5		2	7
2		6	6
0		0	7
0		3	6
4		3	9
6		1	2
12		5	8
10		2	3
0		4	5
9		1	4
4		3	7
5		7	4
6		1	4
2		2	4
4		3	6
2		2	4
7		3	0
7		6	1
7		8	7
13		0	4
6		3	4
1		7	4
5		3	4
1		2	0
9		4	2
0		3	5
1		2	1
4		2	4
8		1	2
7		6	0
0		3	4
3		1	3
4		9	0
3		2	0
6		9	0
6		1	4
4		7	3
3		4	1
		3	3
		6	2
		1	0
		2	0
		6	3
		2	4
		2
		6
		3
		2
		6
		3
		0
		5
		2
		3
		1
		0
		5
		1
		2
		5
		3
		3
		0
		5
		4
		12
		3
		4
		3
		9
		5
		1
		2
		3
		0
		3
		2
		4
		0
		6
		4
		1
		1
		6
		1
		3
		0
		1
		3
		0
		2
		2
		0
		7
		5
		1
		4
		1
		0
		2
		0
		2
		3
		6
		4
		1
		0
		4
		1
		1
		1
		4
		1
		1
		2
		4
		1
		0
		1
