# Supplementary material for: Complex subsets but redundant clonality after B cells egress from spontaneous germinal centers
Source: eLife. 2023 Jun 21;12:e81012. doi: 10.7554/eLife.81012 (PMC10351918; doi:10.7554/eLife.81012)
Supplement: Figure 4—source data 1. [file elife-81012-fig4-data1.csv]

	Autoimmune	Autoimmune	Autoimmune	Autoimmune	Autoimmune	Immunized	Immunized	Immunized	Immunized	Immunized
MemB_1	0.15221239	0.18125960	0.15841584	0.18639053	0.16107383	0.13826367	0.11915888	0.08791209
MemB_2	0.09911504	0.14900154	0.11881188	0.13313609	0.15436242	0.13504823	0.16121495	0.12087912
MemB_3	0.36814159	0.33179724	0.27227723	0.39644970	0.26174497	0.23472669	0.25700935	0.28571429
MemB_4	0.38053097	0.33794163	0.45049505	0.28402367	0.42281879	0.49196141	0.46261682	0.50549451
