# Supplementary material for: Complex subsets but redundant clonality after B cells egress from spontaneous germinal centers
Source: eLife. 2023 Jun 21;12:e81012. doi: 10.7554/eLife.81012 (PMC10351918; doi:10.7554/eLife.81012)
Supplement: Figure 4—source data 2. [file elife-81012-fig4-data2.csv]

MemB-1	MemB-2	MemB-3	MemB-4
8	0	3	0
6	4	3	3
6	0	5	3
4	3	0	1
4	0	10	2
0	0	10	11
7	0	9	2
3	3	7	2
5	3	4	6
7	0	9	3
3	3	5	8
2	3	9	0
7	3	11	2
1	0	7	1
10	5	3	3
5	0	7	1
5	1	2	4
5	2	7	3
4	0	5	6
3	2	10	2
7	1	10	2
8	0	7	8
5	3	7	11
4	1	4	3
8	4	4	3
4	2	10	4
4	3	6	10
2	0	10	2
9	4	3	1
5	3	7	10
6	2	9	5
3	8	9	2
4	4	1	6
7	4	4	3
0	3	7	6
4	3	8	5
1	3	4	2
3	3	4	7
5	4	6	2
7	9	4	11
4	5	6	1
1	0	10	2
4	1	4	2
6	4	3	0
6	3	1	3
2	5	8	2
4	0	1	1
4	1	0	4
2	5	4	6
2	1	5	7
6	7	6	5
5	8	2	4
9	4	6	0
8	0	3	0
7	1	4	5
2	3	2	5
3	2	3	1
10	4	3	5
10	2	9	2
9	3	4	6
4	4	1	0
14	7	1	4
8	1	6	0
7	14	5	0
9	0	4	5
5	0	7	8
1	8	5	4
3	2	5	4
1	2	7	1
3	6	8	0
9	14	4	2
5	2	0	0
9	5	6	2
11	0	3	1
3	2	6	2
9	2	4	4
11	6	4	1
6	0	6	2
2	2	5	3
1	9	5	1
6	0	5	6
6	1	7	6
5	1	2	0
4	0	4	0
4	0	5	2
1	2	1	0
6	6	9	2
6	0	10	3
0	3	4	4
2	2	4	4
3	1	3	0
6	2	5	9
8	4	3	4
9	1	8	5
8	6	9	2
1	0	8	1
10	0	7	5
10	2	6	4
3	1	0	3
7	0	5	4
2	2	4	2
5	9	8	4
2	1	5	1
6	3	6	8
6	3	0	8
6	4	5	7
0	2	6	1
3	2	5	5
0	7	2	1
2	1	8	1
1	2	5	8
5	3	4	5
5	1	1	1
10	3	3	4
5	0	7	6
7	9	2	1
6	1	2	8
9	4	2	2
5	6	6	2
5	0	2	2
8	0	8	0
17	1	2	2
7	6	4	2
3	0	7	3
10	0	5	2
2	0	4	4
6	0	3	5
5	4	2	4
4	0	7	10
1	6	8	0
8	3	6	4
	0	2	10
	2	3	5
		3	3
		6	0
		2	2
		5	3
		2	6
		14	8
		6	10
		3	1
		2	6
		0	8
		5	0
		0	2
		3	10
		0	4
		6	1
		6	1
		3	9
		2	2
		5	8
		7	9
		4	11
		4	7
		7	1
		6	1
		6	0
		8	0
		5	1
		4	4
		6	2
		4	0
		6	8
		11	0
		6	0
		3	6
		5	5
		5	10
		9	5
		1	2
		5	14
		5	0
		10	3
		0	1
		7	3
		2	1
		2	1
		2	4
		2	5
		6	0
		3	14
		2	1
		2	2
		6	0
		7	2
		5	8
		1	6
		6	7
		6	7
		7	6
		0	6
		3	0
		6	7
		8	1
		9	4
		3	6
		5	9
		3	4
		1	3
		3	11
		1	4
		8	4
		4	4
		10	10
		4	5
		5	2
		5	0
		2	3
		2	3
		10	8
		2	5
		3	2
		2	7
		5	5
		4	6
		5	6
		1	0
		9	4
		6	10
		5	0
		8	2
		8	5
		8	2
		6	7
		4	2
		5	0
		6	0
		4	6
		3	0
		7	0
		2	0
		5	5
		7	0
		6	1
		2	0
		2	9
		1	4
		5	4
		6	2
		3	2
		5	3
		6	0
		8	6
		6	4
		5	8
		2	2
		9	4
		6	0
		9	3
		2	4
		1	1
		10	8
		2	10
		5	0
		5	2
		8	7
		2	3
		7	3
		5	8
		10	8
		7	0
		10	11
		6	2
		5	7
		9	6
		5	0
		3	3
		3	0
		8	2
		7	0
		0	0
		4	3
		6	3
		4	1
		11	1
		9	1
		4	7
		4	3
		10	0
		6	4
		2
		7
		6
		5
		4
		4
		2
		0
		7
		6
		8
		6
		5
		4
		3
		9
		0
		0
		7
		3
		5
		6
		4
		17
		3
		11
		3
		3
		2
		11
		3
		10
		4
		7
		9
		7
		6
		1
		5
		8
		8
		8
		4
		6
		3
		2
		1
		2
		6
		5
		5
		5
		5
		5
		10
		5
		4
		11
		3
		1
		4
		5
		6
		10
		5
		2
		9
		1
		7
		8
		4
		5
		6
		6
		8
		1
		3
		2
		4
		9
		2
		8
		0
		9
		5
		5
		1
		6
		7
		8
		0
		9
		1
		5
		3
		4
		4
		5
		10
		3
		3
		2
		4
		3
		10
		6
		6
		10
		10
		8
		8
		4
		2
		1
		1
		9
		7
		0
		6
		1
		2
		0
