# Supplementary material for: Complex subsets but redundant clonality after B cells egress from spontaneous germinal centers
Source: eLife. 2023 Jun 21;12:e81012. doi: 10.7554/eLife.81012 (PMC10351918; doi:10.7554/eLife.81012)
Supplement: Figure 4—source data 3. [file elife-81012-fig4-data3.csv]

MemB-1_auto	MemB-1_immu	MemB-2_auto	MemB-2_immu	MemB-3_auto	MemB-3_immu	MemB-4_auto	MemB-4_immu
2	8	8	0	1	3	8	0
4	6	4	4	3	3	5	3
4	6	0	0	7	5	1	3
2	4	1	3	2	0	4	1
2	4	3	0	2	10	6	2
6	0	2	0	2	10	1	11
5	7	4	0	6	9	8	2
9	3	2	3	2	7	2	2
8	5	3	3	8	4	2	6
7	7	4	0	2	9	2	3
2	3	7	3	4	5	0	8
3	2	1	3	7	9	2	0
10	7	14	3	5	11	2	2
10	1	0	0	4	7	3	1
9	10	0	5	3	3	2	3
4	5	8	0	2	7	4	1
14	5	2	1	7	2	5	4
8	5	2	2	8	7	4	3
7	4	6	0	6	5	10	6
9	3	14	2	2	10	0	2
5	7	2	1	3	10	4	2
1	8	5	0	3	7	10	8
3	5	0	3	6	7	5	11
1	4	2	1	2	4	3	3
3	8	2	4	5	4	0	3
9	4	6	2	2	10	2	4
5	4	0	3	14	6	3	10
9	2	2	0	6	10	6	2
11	9	9	4	3	3	8	1
3	5	0	3	2	7	10	10
9	6	1	2	0	9	1	5
11	3	1	8	5	9	6	2
6	4	0	4	0	1	8	6
2	7	0	4	3	4	0	3
1	0	2	3	0	7	2	6
6	4	6	3	6	8	10	5
6	1	0	3	6	4	4	2
5	3	3	3	3	4	1	7
4	5	2	4	2	6	1	2
4	7	1	9	5	4	9	11
1	4	2	5	7	6	2	1
6	1	4	0	4	10	8	2
6	4	1	1	4	4	9	2
0	6	6	4	7	3	11	0
2	6	0	3	6	1	7	3
3	2	0	5	6	8	1	2
6	5	2	0	8	1	1	1
8	2	1	1	5	0	0	4
9	6	0	5	4	4	0	6
8	6	2	1	6	5	1	7
1	6	9	7	4	6	4	5
10		1	3	6	2	2	4
10		1	3	11	6	0	0
3		3	4	6	3	8	0
7		0	2	3	4	0	5
0		9	2	5	2	0	5
3		1	7	5	3	6	1
0		4	1	9	3	5	5
2		6	2	1	9	10	2
1		0	3	5	4	5	6
5		0		5	1	2	0
5		1		10	1	14	4
10		6		0	6	0	0
5		0		7	5	3	0
7		0		2	4	1	5
6		0		2	7	3	8
9		0		2	5	1	4
5		4		2	5	1	4
5		0		6	7	4	1
8		6		3	8	5	0
17		3		2	4	0	2
7		0		2	0	14	0
3		2		6	6	1	2
10				7	3	2	1
2				5	6	5	2
6				1	4	2	4
5				6	4	7	1
4				6	6	2	2
1				7	5	0	3
8				0	5	0	1
				3	5	6	6
				6	7	0	6
				8	2	0	0
				9	4	0	0
				3	5	5	2
				5	1	0	0
				3	9	1	2
				1	10	0	3
				3	4	9	4
				1	4	4	4
				8	3	4	0
				4	5	2	9
				10	3	2	4
				4	8	3	5
				5	9	0	2
				5	8	6	1
				2	7	4	5
				2	6	8	4
				10	0	2	3
				2	5	4	4
				3	4	0	2
				2	8	3	4
				5	5	4	1
				4	6	1	8
				5	0	8	8
				1	5	10	7
				9	6	0	1
				6	5	2	5
				5	2	7	1
				8	8	3	1
				8	5	3	2
				8	4	8	0
				6	5	8	2
				4	5	0	8
				5	5	11	6
				6	5	2	7
				4	10	7	7
				3	5	6	6
				7	4	0	6
				2	11	3	0
				5	3	0	7
				7	1	2	1
				6	4	0	4
				2	5	0	6
				2	6	3	9
				1	10	3	4
				5	5	1	3
				6	2	1	11
				3	9	1	4
				5	1	7	4
				6	7	3	4
				8	8	0	10
				6	4	4	5
				5	5		2
				2	6		0
				9	6		3
				6			3
				9			8
				2			5
				1			2
				10			7
				2			5
				5			6
				5			6
				8			0
				2			4
				7			10
				5			0
				10
				7
				10
				6
				5
				9
				5
				3
				3
				8
				7
				0
				4
				6
				4
				11
				9
				4
				4
				10
				6
				2
				7
				6
				5
				4
				4
				2
				0
				7
				6
				8
				6
				5
				4
				3
				9
				0
				0
				7
				3
				5
				6
				4
				17
				3
				11
				3
				3
				2
				11
				3
				10
				4
				7
				9
				7
				6
				1
				5
				8
				8
				8
				4
				6
				3
				2
				1
				2
				6
				5
				8
				1
				3
				2
				4
				9
				2
				8
				0
				9
				5
				5
				1
				6
				7
				8
				0
				9
				1
				5
				3
				4
				4
				5
				10
				3
				3
				2
				4
				3
				10
				6
				6
				10
				10
				8
				8
				4
				2
				1
				1
				9
				7
				0
				6
				1
				2
				0
