# Supplementary material for: Complex subsets but redundant clonality after B cells egress from spontaneous germinal centers
Source: eLife. 2023 Jun 21;12:e81012. doi: 10.7554/eLife.81012 (PMC10351918; doi:10.7554/eLife.81012)
Supplement: Supplementary file 1. — This file contains the raw values for the circos plot graphs showing clonal intersects between subsets for Figures 3C and 5A, C. [file elife-81012-supp1.xlsx]

## Sheet: Fig3C_Autoimmune_ASC
	ASC_Early_1	ASC_Early_2	ASC_Late_1	ASC_Late_2	ASC_Mid_1	ASC_Mid_2	ASC_Mid_3
ASC_Early_1	162	30	30	19	29	46	28
ASC_Early_2	30	109	31	31	42	51	39
ASC_Late_1	30	31	120	28	34	43	35
ASC_Late_2	19	31	28	136	45	43	38
ASC_Mid_1	29	42	34	45	153	56	45
ASC_Mid_2	46	51	43	43	56	176	44
ASC_Mid_3	28	39	35	38	45	44	125

## Sheet: Fig3C_Immunized_ASC
	ASC_Early_1	ASC_Early_2	ASC_Late_1	ASC_Late_2	ASC_Mid_1	ASC_Mid_2	ASC_Mid_3
ASC_Early_1	32	7	4	5	5	7	5
ASC_Early_2	7	30	5	8	12	11	5
ASC_Late_1	4	5	18	4	7	4	3
ASC_Late_2	5	8	4	40	10	13	8
ASC_Mid_1	5	12	7	10	34	10	6
ASC_Mid_2	7	11	4	13	10	33	7
ASC_Mid_3	5	5	3	8	6	7	17

## Sheet: Fig5A_Autoimmune_MemB
	MemB_1	MemB_2	MemB_3	MemB_4
MemB_1	79	2	8	1
MemB_2	2	71	9	3
MemB_3	8	9	229	5
MemB_4	1	3	5	134

## Sheet: Fig5A_Immunized_MemB
	MemB_1	MemB_2	MemB_3	MemB_4
MemB_1	49	6	8	5
MemB_2	6	52	7	4
MemB_3	8	7	100	10
MemB_4	5	4	10	135

## Sheet: Fig5C_Autoimmune_MemB-ASC
	ASC_Early_1	ASC_Early_2	ASC_Late_1	ASC_Late_2	ASC_Mid_1	ASC_Mid_2	ASC_Mid_3
MemB_1	6	4	3	3	6	5	3
MemB_2	2	5	2	6	4	3	3
MemB_3	33	35	24	38	46	40	42
MemB_4	0	0	0	2	2	1	0

## Sheet: Fig5C_Immunized_MemB-ASC
	ASC_Early_1	ASC_Early_2	ASC_Late_1	ASC_Late_2	ASC_Mid_1	ASC_Mid_2	ASC_Mid_3
MemB_1	3	2	1	2	4	2	1
MemB_2	5	3	0	1	1	3	2
MemB_3	7	7	7	7	9	9	5
MemB_4	3	1	1	3	2	2	0
